# Supplementary material for: Application of a Novel Fusion Tag System for Enhanced Soluble Expression of Recombinant Proteins in Escherichia coli
Source: Research Square preprint supplement (doi:10.21203/rs.3.rs-8180750/v1), 2025-12-08
Supplement: Supplementary file 1 [file 95bf96b52bc0e8e7f1d16676.docx]

**Table S1 Bacterial strains and plasmids used in this study**

| Strains or plasmids | Relevant characteristics | Source |
| --- | --- | --- |
| *E. coli* |  |  |
| DH-5α | F-deoR endA1 gyrA96 hsdR17(rK-mK+) recA1 relA1 supE44 thi-1 △(lacZYA-argF)U169 (φ80lacZ△M15) | Lab collection |
| BL21(DE3) | F- *ompThsdSB* (rB-mB-) *galdcm* (DE3) | Lab collection |
| Sinorhizobium meliloti Rm1021 | Wild-type strain | Lab collection |
| MG1655 | Wild-type strain | Lab collection |
| Plasmids |  |  |
| pET-28b(+) |  | Lab collection |
| pArsC | ArsC-linker-TEV-His in pET-28b(+) | This study |
| pCrr | Crr-linker-TEV-His in pET-28b(+) | This study |
| pDsbA | DsbA-linker-TEV-His in pET-28b(+) | This study |
| pEcotin | Ecotin-linker-TEV-His in pET-28b(+) | This study |
| pMsyB | MsyB-linker-TEV-His in pET-28b(+) | This study |
| pSlyD | SlyD-linker-TEV-His in pET-28b(+) | This study |
| pSnut | Snut-linker-TEV-His in pET-28b(+) | This study |
| pYjgD | YjgD-linker-TEV-His in pET-28b(+) | This study |
| pET-28(b)-NodE | *SmnodE* in pET-28b(+) | This study |
| pET-28(b)-FabF1XL | *SmfabF1XL* in pET-28b(+) | This study |
| pET-28(b)-FabF2XL | *SmfabF2XL* in pET-28b(+) | This study |
| pET-28(b)-FabZXL | *SmfabZXL* in pET-28b(+) | This study |
| pET-28(b)-FabGXL | *SmfabGXL* in pET-28b(+) | This study |
| pET-28(b)-Mals | *Bsmals* in pET-28b(+) | This study |
| pET-28(b)-PulA | *TnpulA* in pET-28b(+) | This study |
| pET-28(b)-EcFabG | *EcfabG* in pET-28b(+) | This study |
| pET-28(b)-eGFP | *egfp* in pET-28b(+) | This study |
| pArsC-NodE | *arsC-SmnodE* in pET-28b(+) | This study |
| pArsC-FabF1XL | *arsC-SmfabF1XL* in pET-28b(+) | This study |
| pArsC-FabF2XL | *arsC-SmfabF2XL* in pET-28b(+) | This study |
| pArsC-FabZXL | *arsC-SmfabZXL* in pET-28b(+) | This study |
| pArsC-FabGXL | *arsC-SmfabGXL* in pET-28b(+) | This study |
| pArsC-Mals | *arsC-Bsmals* in pET-28b(+) | This study |
| pArsC-PulA | *arsC-TnpulA* in pET-28b(+) | This study |
| pArsC-EcFabG | *arsC-EcfabG* in pET-28b(+) | This study |
| pArsC-eGFP | *arsC-egfp* in pET-28b(+) | This study |
| pCrr-NodE | *crr-SmnodE* in pET-28b(+) | This study |
| pCrr-FabF1XL | *crr-SmfabF1XL* in pET-28b(+) | This study |
| pCrr-FabF2XL | *crr-SmfabF2XL* in pET-28b(+) | This study |
| pCrr-FabZXL | *crr-SmfabZXL* in pET-28b(+) | This study |
| pCrr-FabGXL | *crr-SmfabGXL* in pET-28b(+) | This study |
| pCrr-Mals | *crr-Bsmals* in pET-28b(+) | This study |
| pCrr-PulA | *crr-TnpulA* in pET-28b(+) | This study |
| pCrr-EcFabG | *crr-EcfabG* in pET-28b(+) | This study |
| pCrr-eGFP | *crr-egfp* in pET-28b(+) | This study |
| pDsbA -NodE | *dsbA-SmnodE* in pET-28b(+) | This study |
| pDsbA -FabF1XL | *dsbA-SmfabF1XL* in pET-28b(+) | This study |
| pDsbA -FabF2XL | *dsbA-SmfabF2XL* in pET-28b(+) | This study |
| pDsbA -FabZXL | *dsbA-SmfabZXL* in pET-28b(+) | This study |
| pDsbA -FabGXL | *dsbA-SmfabGXL* in pET-28b(+) | This study |
| pDsbA -Mals | *dsbA-Bsmals* in pET-28b(+) | This study |
| pDsbA -PulA | *dsbA-TnpulA* in pET-28b(+) | This study |
| pDsbA -EcFabG | *dsbA-EcfabG* in pET-28b(+) | This study |
| pDsbA -eGFP | *dsbA-egfp* in pET-28b(+) | This study |
| pEcotin -NodE | *ecotin-SmnodE* in pET-28b(+) | This study |
| pEcotin -FabF1XL | *ecotin-SmfabF1XL* in pET-28b(+) | This study |
| pEcotin -FabF2XL | *ecotin-SmfabF2XL* in pET-28b(+) | This study |
| pEcotin -FabZXL | *ecotin-SmfabZXL* in pET-28b(+) | This study |
| pEcotin -FabGXL | *ecotin-SmfabGXL* in pET-28b(+) | This study |
| pEcotin -Mals | *ecotin-Bsmals* in pET-28b(+) | This study |
| pEcotin -PulA | *ecotin-TnpulA* in pET-28b(+) | This study |
| pEcotin -EcFabG | *ecotin-EcfabG* in pET-28b(+) | This study |
| pEcotin -eGFP | *ecotin-egfp* in pET-28b(+) | This study |
| pMsyB -NodE | *msyB-SmnodE* in pET-28b(+) | This study |
| pMsyB -FabF1XL | *msyB-SmfabF1XL* in pET-28b(+) | This study |
| pMsyB -FabF2XL | *msyB-SmfabF2XL* in pET-28b(+) | This study |
| pMsyB -FabZXL | *msyB-SmfabZXL* in pET-28b(+) | This study |
| pMsyB -FabGXL | *msyB-SmfabGXL* in pET-28b(+) | This study |
| pMsyB -Mals | *msyB-Bsmals* in pET-28b(+) | This study |
| pMsyB -PulA | *msyB-TnpulA* in pET-28b(+) | This study |
| pMsyB -EcFabG | *msyB-EcfabG* in pET-28b(+) | This study |
| pMsyB -eGFP | *msyB-egfp* in pET-28b(+) | This study |
| pSlyD -NodE | *slyD-SmnodE* in pET-28b(+) | This study |
| pSlyD -FabF1XL | *slyD-SmfabF1XL* in pET-28b(+) | This study |
| pSlyD -FabF2XL | *slyD-SmfabF2XL* in pET-28b(+) | This study |
| pSlyD -FabZXL | *slyD-SmfabZXL* in pET-28b(+) | This study |
| pSlyD -FabGXL | *slyD-SmfabGXL* in pET-28b(+) | This study |
| pSlyD -Mals | *slyD-Bsmals* in pET-28b(+) | This study |
| pSlyD -PulA | *slyD-TnpulA* in pET-28b(+) | This study |
| pSlyD -EcFabG | *slyD-EcfabG* in pET-28b(+) | This study |
| pSlyD -eGFP | *slyD-egfp* in pET-28b(+) | This study |
| pSnut -NodE | *snut-SmnodE* in pET-28b(+) | This study |
| pSnut -FabF1XL | *snut-SmfabF1XL* in pET-28b(+) | This study |
| pSnut -FabF2XL | *snut-SmfabF2XL* in pET-28b(+) | This study |
| pSnut -FabZXL | *snut-SmfabZXL* in pET-28b(+) | This study |
| pSnut -FabGXL | *snut-SmfabGXL* in pET-28b(+) | This study |
| pSnut -Mals | *snut-Bsmals* in pET-28b(+) | This study |
| pSnut -PulA | *snut-TnpulA* in pET-28b(+) | This study |
| pSnut -EcFabG | *snut-EcfabG* in pET-28b(+) | This study |
| pSnut -eGFP | *snut-egfp* in pET-28b(+) | This study |
| pYjgD -NodE | *yjgD-SmnodE* in pET-28b(+) | This study |
| pYjgD -FabF1XL | *yjgD-SmfabF1XL* in pET-28b(+) | This study |
| pYjgD -FabF2XL | *yjgD-SmfabF2XL* in pET-28b(+) | This study |
| pYjgD -FabZXL | *yjgD-SmfabZXL* in pET-28b(+) | This study |
| pYjgD -FabGXL | *yjgD-SmfabGXL* in pET-28b(+) | This study |
| pYjgD -Mals | *yjgD-Bsmals* in pET-28b(+) | This study |
| pYjgD -PulA | *yjgD-TnpulA* in pET-28b(+) | This study |
| pYjgD -EcFabG | *yjgD-EcfabG* in pET-28b(+) | This study |
| pYjgD -eGFP | *yjgD-egfp* in pET-28b(+) | This study |

**Table S2 Primers used in this study**

| Primer | Sequence | Restriction site |
| --- | --- | --- |
| Arsc-P1 | CATGCCATGGGTagcaacattaccatttatc | *Nco*I |
| Arsc-P2 | cctggcggACCACCGGTACCtttcaggcgcttacccgcttc | *Kpn*I |
| P3 | GAAATACAGGTTTTCaccgcctggcggACCACCGG |  |
| P4 | GTGGTGGTGGTGGTGGCCCTGGAAATACAGGTTTTC |  |
| P5 | CGGATCCcatATGGTGGTGGTGGTGGTGGTGGCC |  |
| P6 | CGGAGCTCGAATTCGGATCCcatATGGTGGTGGTGG |  |
| Crr P1 | CTTTAAGAAGGAGATATACCATGGtgggtttgttcgataaactg | *Nco*I |
| Crr P2 | gcctggcggACCACCGGTACCcttcttgatgcggataac | *Kpn*I |
| DsbA P1 | CATGCCATGGtgaaaaagatttggctggcgc | *Nco*I |
| DsbA P2 | CGGGGTACCttttttctcggacagatatttcac | *Kpn*I |
| Ecotin P1 | CATGCCATGGtgaagaccattctacctgcag | *Nco*I |
| Ecotin P2 | CGGGGTACCgcgaactaccgcgttgtc | *Kpn*I |
| MsyB P1 | CATGCCATGGtgaccatgtacgcaacgcttg | *Nco*I |
| MsyB P2 | CGGGGTACCacgttcatcccactcatcag | *Kpn*I |
| SlyD P1 | CTTTAAGAAGGAGATATACCATGGtgaaagtagcaaaagacc | *Nco*I |
| SlyD P2 | cctggcggACCACCGGTACCgtggcaaccgcaaccgcc | *Kpn*I |
| SNUT P1 | CATGCCATGGtgAAACCACATATCGATAATTATC | *Nco*I |
| SNUT P2 | CGGGGTACCGGATCCATCTAGAACTTCTAC | *Kpn*I |
| YjgD P1 | CATGCCATGGtggcaaacccggaacaactgg | *Nco*I |
| YjgD P2 | CGGGGTACCgtggcgaactccgtcatcgtc | *Kpn*I |
| eGFP-P1 | CGCCATatgGTGAGCAAGGGCGAGGAG | *Nde*I |
| eGFP-P2 | CCCAAGCTTCTTGTACAGCTCGTCCATG | *Hin*dIII |
| EcFabG-P1 | CGCCATatgAATTTTGAAGGAAAAATCGCACTGG | *Nde*I |
| EcFabG-P2 | CCCAAGCTTGACCATGTACATCCCGCC | *Hin*dIII |
| PulA-F | GGGAATTCCATatgAAgACTCGTTTtTGGATt | *Nde*I |
| PulA-R | ctagcAAGCTTTTCACGATACAGAACGTAg | *Hin*dIII |
| Mals-F | GGGAATTCCATatgCgTaaagaagccatccac | *Nde*I |
| Mals-R | ctagcAAGCTTccagctttcgaccgcgtaaag | *Hin*dIII |
| SmNodE-F | GGGAATTCCATATGGACAGGCGCGTTGTCAT | *Nde*I |
| SmNodE-R | ctagAAGCTTTACCTGCTTGAATGCCAG | *Hin*dIII |
| SmFabGXL-F | GGGAATTCCATatgcgcgccctgcaattgctc | *Nde*I |
| SmFabGXL-R | ctagGAATTCCAatccatccgcaacacgatc | *Hin*dIII |
| SmFabF1XL-F | GGGAATTCCATatgagcaaggcttataaggac | *Nde*I |
| SmFabF1XL-R | ctagcAAGCTTggccggctcggcggtcatgac | *Hin*dIII |
| SmFabF2XL-F | GGGAATTCCATatgacgaaatccgcgaacgatg | *Nde*I |
| SmFabF2XL-R | ctagcAAGCTTttccgcggcaagcacggcg | *Hin*dIII |
| SmFabZXL-F | GGGAATTCCATatgctccttgaatgtttccag | *Nde*I |
| SmFabZXL-R | ctagcAAGCTTcttctccgaaccggccatc | *Hin*dIII |

**Table S3 Calculated physicochemical properties of the eight solubility-enhancing fusion tags and their solubilization efficacy scores**

| Tags | Size (kDa) | pI | GRAVY | Net Charge (pH 7.0) | eGFP | EcFabG | Mals | NodE | FabGXL | FabF1XL | FabF2XL | FabZXL | Average Solubilization Efficacy |
| --- | --- | --- | --- | --- | --- | --- | --- | --- | --- | --- | --- | --- | --- |
| ArsC | 15.7 | 5.437 | -0.296 | -4.893 | 2 | 1 | 2 | 1 | 1 | 1 | 1 | 2 | 1.375 |
| Crr | 18.1 | 4.741 | 0.046 | -10.391 | 1 | 0 | 3 | 1 | 1 | 1 | 1 | 2 | 1.25 |
| DsbA | 23.0 | 5.974 | -0.141 | -3.02 | 2 | 1 | 2 | 1 | 1 | 1 | 1 | 3 | 1.5 |
| Ecotin | 18.1 | 6.478 | -0.271 | -1.104 | 2 | 1 | 1 | 1 | 1 | 1 | 1 | 3 | 1.375 |
| MsyB | 14.1 | 3.590 | -0.855 | -33.758 | 3 | 1 | 3 | 2 | 0 | 2 | 2 | 3 | 2 |
| SlyD | 20.7 | 4.881 | -0.394 | -26.447 | 2 | 0 | 3 | 1 | 1 | 1 | 1 | 2 | 1.375 |
| Snut | 16.8 | 6.324 | -1.106 | -1.79 | 3 | 1 | 2 | 2 | 1 | nd | nd | 2 | 1.833 |
| YjgD | 15.5 | 3.636 | -0.623 | -41.408 | 3 | 1 | 1 | 1 | 2 | 2 | 2 | 3 | 1.875 |

<https://web.expasy.org/cgi-bin/protparam/protparam> for GRAVY.

<https://www.protpi.ch/Calculator/ProteinTool> for Isoelectric point and Net charge at pH 7.4.

Theoretical Isoelectric Point (pI): The pH at which the protein has a net charge of zero. Group tags into "Highly Acidic (pI < 5.0)" and "Less Acidic (pI > 5.5)".

Grand Average of Hydropathicity (GRAVY): The average of the hydropathy indices of all amino acids. A negative value indicates a hydrophilic protein; a positive value indicates a hydrophobic protein.

Net Charge: At a specific pH (pH 7.4), count the number of positively charged residues (Lysine **K**, Arginine **R**; Histidine **H** has a small contribution at pH 7.0 and is sometimes omitted for simplicity) and negatively charged residues (Aspartic acid **D**, Glutamic acid **E**). Net Charge ≈ (Number of K + R) - (Number of D + E).

**"Solubilization Efficacy"Scoring System:**

**3 = High Efficacy: Dramatic improvement (e.g., solubility increases from <20% to >80%).**

**2 = Moderate Efficacy:** Clear improvement in solubility. **(e.g., solubility increases from <20% to >40%).**

**1 = Low/No Efficacy:** Little to no effect.

**0 = Negative Effect:** Leads to inclusion body formation where the target was soluble without a tag.

**Figure S1 Calibration Curve for Glucose Concentration**


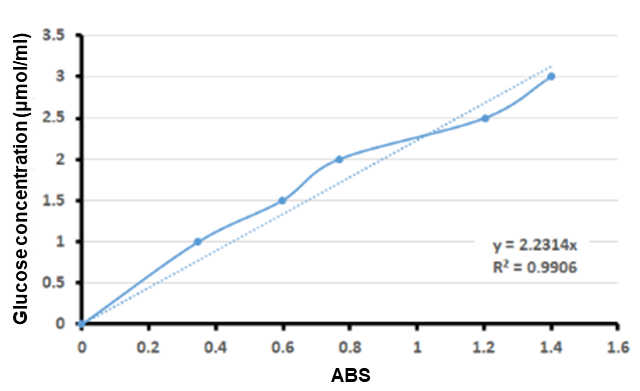


**Figure S2 SDS-PAGE analysis of** **PulA expression**

**
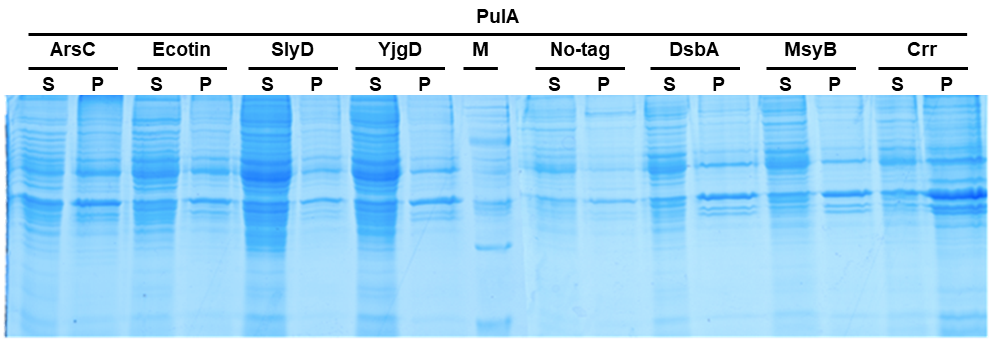
**

Recombinant protein expression in *E. coli* BL21 (DE3) harboring different fusion tag constructs. Cultures were grown in LB medium and induced with 240 μg/mL IPTG at 37°C for 4 h. SDS-PAGE analysis of the soluble fraction (supernatants, S) and insoluble fraction (pellets, P) of PulA fused with various tags. M, protein molecular weight marker.
